# Supplementary material for: Identification of Wnt Pathway Target Genes Regulating the Division and Differentiation of Larval Seam Cells and Vulval Precursor Cells in Caenorhabditis elegans
Source: PubMed Central journal article supplement (PMC4528312; doi:10.1534/g3.115.017715), 2015-06-05
Supplement: supp_g3.115.017715_TableS1.pdf [file supp_g3.115.017715_TableS1.pdf]

**Table S1 239 putative Wnt targets from seam cells and VPCs.** Shown are 239 putative Wnt targets identified by microarray analysis: the average fold change and p value in Wnt pathway over-activation conditions is shown for each gene. ‘\*’ indicates 24 genes previously known to be expressed in the seam cells (Wormbase release 220). ‘§’ indicates 12 genes previously known to be expressed in the vulval cell lineage (Wormbase release 220) ‘#’ indicates five genes shown to be expressed in seam cells, hypodermal cells and P cells by Jackson et al., 2014.

| Gene WB ID     | Gene Public Name             | p-value Wnt over-activation | fold change Wnt Over-activation |
|----------------|------------------------------|-----------------------------|---------------------------------|
| WBGene00000615 | <i>col-38</i> <sup>#</sup>   | 0.000                       | 29.7                            |
| WBGene00000626 | <i>col-49</i> <sup>#</sup>   | 0.000                       | 23.5                            |
| WBGene00013754 | <i>fbxa-116</i>              | 0.002                       | 16.1                            |
| WBGene00006509 | <i>tag-164</i>               | 0.000                       | 14.6                            |
| WBGene00007381 | <i>C06C6.7</i>               | 0.000                       | 14.3                            |
| WBGene00018295 | <i>oac-29</i>                | 0.002                       | 14.2                            |
| WBGene00012046 | <i>T26E4.4</i> <sup>#</sup>  | 0.003                       | 13.3                            |
| WBGene00014079 | <i>ZK792.7</i>               | 0.000                       | 12.8                            |
| WBGene00022140 | <i>Y71G12A.4</i>             | 0.008                       | 12.1                            |
| WBGene00009898 | <i>dod-23</i>                | 0.000                       | 11.8                            |
| WBGene00013986 | <i>ZK512.7</i>               | 0.001                       | 11.2                            |
| WBGene00001068 | <i>dpy-6</i>                 | 0.004                       | 10.7                            |
| WBGene00015765 | <i>C14C11.1</i>              | 0.000                       | 10.3                            |
| WBGene00022589 | <i>ZC317.6</i>               | 0.000                       | 10.3                            |
| WBGene00008211 | <i>C49F5.7</i>               | 0.002                       | 10.3                            |
| WBGene00016058 | <i>nspd-3</i>                | 0.001                       | 10.0                            |
| WBGene00012783 | <i>Y43C5A.3</i>              | 0.001                       | 10.0                            |
| WBGene00003763 | <i>nlp-25</i>                | 0.017                       | 10.0                            |
| WBGene00044630 | <i>bus-17</i>                | 0.007                       | 9.6                             |
| WBGene00017485 | <i>F15E6.4</i>               | 0.001                       | 9.4                             |
| WBGene00017488 | <i>dct-7</i>                 | 0.031                       | 8.7                             |
| WBGene00016683 | <i>C45G9.12</i>              | 0.004                       | 8.5                             |
| WBGene00011226 | <i>R11.1</i>                 | 0.001                       | 7.8                             |
| WBGene00011624 | <i>T08G5.3</i>               | 0.004                       | 7.8                             |
| WBGene00021379 | <i>Y37E11B.7</i>             | 0.034                       | 7.7                             |
| WBGene00012591 | <i>nspe-1</i>                | 0.022                       | 7.5                             |
| WBGene00015182 | <i>B0416.7</i>               | 0.002                       | 7.4                             |
| WBGene00001691 | <i>grd-2</i>                 | 0.004                       | 6.9                             |
| WBGene00003862 | <i>old-1</i>                 | 0.004                       | 6.7                             |
| WBGene00003863 | <i>old-2</i>                 | 0.004                       | 6.7                             |
| WBGene00018380 | <i>F43C11.3</i>              | 0.036                       | 6.6                             |
| WBGene00021731 | <i>Y49G5A.1</i>              | 0.000                       | 6.3                             |
| WBGene00000647 | <i>col-71</i> <sup>#</sup>   | 0.001                       | 6.2                             |
| WBGene00020033 | <i>R12E2.7</i> <sup>§*</sup> | 0.012                       | 6.2                             |
| WBGene00017759 | <i>F23H11.3</i>              | 0.002                       | 6.0                             |
| WBGene00008472 | <i>E03H4.4</i>               | 0.000                       | 6.0                             |
| WBGene00013514 | <i>Y73F4A.1</i>              | 0.019                       | 6.0                             |

|                |                            |       |     |
|----------------|----------------------------|-------|-----|
| WBGene00018744 | <i>F53B3.6</i>             | 0.008 | 5.9 |
| WBGene00022024 | <i>Y64H9A.2</i>            | 0.000 | 5.9 |
| WBGene00009130 | <i>F25H5.8</i>             | 0.012 | 5.8 |
| WBGene00000656 | <i>col-80</i>              | 0.007 | 5.8 |
| WBGene00001079 | <i>dpy-20</i>              | 0.002 | 5.6 |
| WBGene00007297 | <i>C04F12.1</i>            | 0.004 | 5.5 |
| WBGene00050896 | <i>ttr-56</i>              | 0.000 | 5.4 |
| WBGene00010856 | <i>M04C9.1</i>             | 0.001 | 5.4 |
| WBGene00010743 | <i>K10D6.3</i>             | 0.012 | 5.2 |
| WBGene00001882 | <i>his-8</i>               | 0.001 | 5.2 |
| WBGene00001894 | <i>his-20</i>              | 0.001 | 5.2 |
| WBGene00001896 | <i>his-22</i>              | 0.001 | 5.2 |
| WBGene00001926 | <i>his-52</i>              | 0.001 | 5.2 |
| WBGene00011077 | <i>R07B1.5</i>             | 0.007 | 5.2 |
| WBGene00004394 | <i>rol-1</i>               | 0.001 | 5.2 |
| WBGene00021427 | <i>Y38F2AR.9</i>           | 0.006 | 5.2 |
| WBGene00015758 | <i>nhr-155</i>             | 0.001 | 5.1 |
| WBGene00000930 | <i>dao-4<sup>#</sup></i>   | 0.011 | 5.0 |
| WBGene00018219 | <i>F40A3.4</i>             | 0.003 | 5.0 |
| WBGene00015865 | <i>C16E9.1</i>             | 0.004 | 4.9 |
| WBGene00016926 | <i>nhr-171</i>             | 0.005 | 4.8 |
| WBGene00011948 | <i>T23F1.5</i>             | 0.000 | 4.8 |
| WBGene00003664 | <i>nhr-74*</i>             | 0.004 | 4.8 |
| WBGene00011814 | <i>T16H12.4</i>            | 0.011 | 4.8 |
| WBGene00045387 | <i>K09H9.8</i>             | 0.004 | 4.7 |
| WBGene00021994 | <i>Y59E9AL.4</i>           | 0.005 | 4.7 |
| WBGene00011533 | <i>T06E4.5</i>             | 0.010 | 4.6 |
| WBGene00020380 | <i>T09B4.6</i>             | 0.006 | 4.5 |
| WBGene00020769 | <i>T24D8.6</i>             | 0.020 | 4.5 |
| WBGene00021605 | <i>Y46H3C.5</i>            | 0.013 | 4.5 |
| WBGene00015172 | <i>B0410.3</i>             | 0.001 | 4.5 |
| WBGene00014003 | <i>ZK593.3</i>             | 0.050 | 4.5 |
| WBGene00011023 | <i>R05A10.6</i>            | 0.014 | 4.5 |
| WBGene00015769 | <i>C14C11.7</i>            | 0.001 | 4.5 |
| WBGene00013438 | <i>ztf-29</i>              | 0.030 | 4.4 |
| WBGene00003703 | <i>nhr-113*</i>            | 0.019 | 4.3 |
| WBGene00015340 | <i>C02E7.7</i>             | 0.000 | 4.3 |
| WBGene00006534 | <i>tba-8*</i>              | 0.001 | 4.3 |
| WBGene00012594 | <i>nspe-5</i>              | 0.000 | 4.3 |
| WBGene00004202 | <i>pry-1<sup>S*</sup></i>  | 0.018 | 4.2 |
| WBGene00017436 | <i>F13H8.3</i>             | 0.029 | 4.1 |
| WBGene00020613 | <i>T20D4.7</i>             | 0.036 | 4.1 |
| WBGene00000493 | <i>che-14<sup>S*</sup></i> | 0.037 | 4.1 |
| WBGene00022816 | <i>fbn-1</i>               | 0.027 | 4.1 |
| WBGene00043147 | <i>nspd-6</i>              | 0.004 | 4.1 |
| WBGene00015339 | <i>C02E7.6</i>             | 0.000 | 4.1 |
| WBGene00009026 | <i>F21G4.5</i>             | 0.008 | 4.0 |

|                |                           |       |     |
|----------------|---------------------------|-------|-----|
| WBGene00000406 | <i>cdk-4<sup>S*</sup></i> | 0.007 | 3.9 |
| WBGene00005672 | <i>sru-9</i>              | 0.000 | 3.9 |
| WBGene00011594 | <i>T07G12.3</i>           | 0.033 | 3.9 |
| WBGene00001885 | <i>his-11</i>             | 0.005 | 3.9 |
| WBGene00001889 | <i>his-15</i>             | 0.005 | 3.9 |
| WBGene00001918 | <i>his-44*</i>            | 0.005 | 3.9 |
| WBGene00019306 | <i>K02E7.1</i>            | 0.043 | 3.9 |
| WBGene00018416 | <i>retr-1</i>             | 0.007 | 3.9 |
| WBGene00009787 | <i>F46F2.3</i>            | 0.018 | 3.8 |
| WBGene00000516 | <i>cki-1<sup>S*</sup></i> | 0.007 | 3.8 |
| WBGene00015196 | <i>B0454.5</i>            | 0.011 | 3.8 |
| WBGene00000072 | <i>add-1*</i>             | 0.009 | 3.7 |
| WBGene00011033 | <i>R05D11.5</i>           | 0.000 | 3.7 |
| WBGene00017297 | <i>F09E10.7</i>           | 0.002 | 3.7 |
| WBGene00000653 | <i>col-77</i>             | 0.001 | 3.7 |
| WBGene00013661 | <i>Y105C5B.23</i>         | 0.031 | 3.7 |
| WBGene00001878 | <i>his-4</i>              | 0.003 | 3.7 |
| WBGene00002393 | <i>lpr-1</i>              | 0.020 | 3.6 |
| WBGene00017799 | <i>F25G6.8</i>            | 0.015 | 3.6 |
| WBGene00012324 | <i>rhy-1</i>              | 0.029 | 3.6 |
| WBGene00009590 | <i>ttr-4</i>              | 0.012 | 3.6 |
| WBGene00010538 | <i>ttr-3</i>              | 0.012 | 3.6 |
| WBGene00015051 | <i>B0218.7</i>            | 0.000 | 3.6 |
| WBGene00006367 | <i>sym-2</i>              | 0.001 | 3.6 |
| WBGene00003446 | <i>msp-53</i>             | 0.002 | 3.5 |
| WBGene00006539 | <i>tbb-6</i>              | 0.000 | 3.5 |
| WBGene00020873 | <i>T28A11.6</i>           | 0.027 | 3.5 |
| WBGene00011665 | <i>T09F5.1</i>            | 0.010 | 3.5 |
| WBGene00009160 | <i>F26E4.5</i>            | 0.018 | 3.5 |
| WBGene00000711 | <i>col-138</i>            | 0.000 | 3.4 |
| WBGene00011398 | <i>qdpr-1</i>             | 0.021 | 3.4 |
| WBGene00017783 | <i>F25E5.2</i>            | 0.008 | 3.4 |
| WBGene00021997 | <i>Y59E9AR.1</i>          | 0.001 | 3.4 |
| WBGene00022002 | <i>Y59E9AR.7</i>          | 0.001 | 3.4 |
| WBGene00021927 | <i>Y55F3AM.10</i>         | 0.001 | 3.4 |
| WBGene00016919 | <i>C54E4.4</i>            | 0.025 | 3.4 |
| WBGene00015442 | <i>C04F1.1</i>            | 0.050 | 3.4 |
| WBGene00016641 | <i>C44C1.1</i>            | 0.014 | 3.3 |
| WBGene00007770 | <i>nhr-259</i>            | 0.038 | 3.3 |
| WBGene00018689 | <i>F52D2.7</i>            | 0.001 | 3.3 |
| WBGene00015987 | <i>C18G1.9</i>            | 0.001 | 3.3 |
| WBGene00012323 | <i>oac-54</i>             | 0.032 | 3.3 |
| WBGene00018702 | <i>F52E4.5</i>            | 0.002 | 3.2 |
| WBGene00001984 | <i>hog-1</i>              | 0.018 | 3.1 |
| WBGene00019234 | <i>ugt-8</i>              | 0.011 | 3.1 |

|                |                          |       |     |
|----------------|--------------------------|-------|-----|
| WBGene00000596 | <i>col-7*</i>            | 0.010 | 3.1 |
| WBGene00000638 | <i>col-62</i>            | 0.010 | 3.1 |
| WBGene00003102 | <i>mab-5<sup>Δ</sup></i> | 0.013 | 3.1 |
| WBGene00008290 | <i>C54C8.2*</i>          | 0.033 | 3.1 |
| WBGene00020216 | <i>trap-2</i>            | 0.031 | 3.1 |
| WBGene00020445 | <i>T12B3.2</i>           | 0.008 | 3.1 |
| WBGene00015950 | <i>C18A11.4</i>          | 0.000 | 3.1 |
| WBGene00010225 | <i>ttr-31</i>            | 0.025 | 3.0 |
| WBGene00010800 | <i>srsx-37</i>           | 0.009 | 3.0 |
| WBGene00012055 | <i>srsx-36</i>           | 0.009 | 3.0 |
| WBGene00016192 | <i>C28H8.1</i>           | 0.002 | 3.0 |
| WBGene00000734 | <i>col-161</i>           | 0.008 | 3.0 |
| WBGene00000735 | <i>col-162</i>           | 0.008 | 3.0 |
| WBGene00001480 | <i>fmo-5</i>             | 0.015 | 3.0 |
| WBGene00014162 | <i>ZK938.6</i>           | 0.006 | 3.0 |
| WBGene00016294 | <i>C31H2.4</i>           | 0.008 | 2.9 |
| WBGene00044623 | <i>bus-8*</i>            | 0.013 | 2.9 |
| WBGene00015453 | <i>C04G6.2</i>           | 0.007 | 2.9 |
| WBGene00077489 | <i>C04G6.13</i>          | 0.007 | 2.9 |
| WBGene00003444 | <i>msp-51</i>            | 0.026 | 2.9 |
| WBGene00003448 | <i>msp-55</i>            | 0.026 | 2.9 |
| WBGene00003450 | <i>msp-57</i>            | 0.026 | 2.9 |
| WBGene00011434 | <i>T04D3.5</i>           | 0.016 | 2.8 |
| WBGene00006660 | <i>twk-5</i>             | 0.015 | 2.8 |
| WBGene00000969 | <i>dhs-5</i>             | 0.013 | 2.8 |
| WBGene00001253 | <i>elt-6<sup>Δ</sup></i> | 0.011 | 2.8 |
| WBGene00021486 | <i>lbp-9</i>             | 0.001 | 2.8 |
| WBGene00010742 | <i>K10D6.2</i>           | 0.004 | 2.7 |
| WBGene00016449 | <i>C35D10.13</i>         | 0.002 | 2.7 |
| WBGene00003622 | <i>nhr-23</i>            | 0.002 | 2.7 |
| WBGene00000720 | <i>col-147</i>           | 0.050 | 2.7 |
| WBGene00008435 | <i>glna-2</i>            | 0.022 | 2.6 |
| WBGene00016011 | <i>C23G10.2</i>          | 0.007 | 2.6 |
| WBGene00012165 | <i>cutl-6</i>            | 0.049 | 2.6 |
| WBGene00017348 | <i>F10E7.6</i>           | 0.036 | 2.6 |
| WBGene00009657 | <i>F43G6.4</i>           | 0.023 | 2.6 |
| WBGene00001692 | <i>grd-3*</i>            | 0.008 | 2.5 |
| WBGene00012420 | <i>Y7A9D.1</i>           | 0.007 | 2.5 |
| WBGene00009489 | <i>F36G9.13</i>          | 0.001 | 2.5 |
| WBGene00009675 | <i>F44A6.3</i>           | 0.034 | 2.5 |
| WBGene00002070 | <i>ile-1</i>             | 0.004 | 2.5 |
| WBGene00000990 | <i>dhs-27</i>            | 0.016 | 2.5 |
| WBGene00016346 | <i>fbxa-120</i>          | 0.006 | 2.5 |
| WBGene00018252 | <i>F40H3.6</i>           | 0.003 | 2.5 |
| WBGene00012364 | <i>W09D12.1</i>          | 0.009 | 2.5 |

|                |                             |       |     |
|----------------|-----------------------------|-------|-----|
| WBGene00001703 | <i>grd-14*</i>              | 0.002 | 2.4 |
| WBGene00010289 | <i>F58H1.6</i>              | 0.015 | 2.4 |
| WBGene00021845 | <i>rpb-7</i>                | 0.000 | 2.4 |
| WBGene00007592 | <i>C14H10.2</i>             | 0.015 | 2.4 |
| WBGene00012443 | <i>Y15E3A.4</i>             | 0.010 | 2.3 |
| WBGene00009807 | <i>pepm-1</i>               | 0.004 | 2.3 |
| WBGene00015593 | <i>C08E3.1</i>              | 0.036 | 2.3 |
| WBGene00015605 | <i>C08E3.13</i>             | 0.036 | 2.3 |
| WBGene00000601 | <i>col-12</i>               | 0.028 | 2.3 |
| WBGene00003611 | <i>nhr-12</i>               | 0.015 | 2.3 |
| WBGene00005025 | <i>sqv-7<sup>S*</sup></i>   | 0.007 | 2.2 |
| WBGene00017082 | <i>DC2.5</i>                | 0.004 | 2.2 |
| WBGene00010051 | <i>F54D5.5</i>              | 0.018 | 2.2 |
| WBGene00011890 | <i>T21C9.1</i>              | 0.005 | 2.2 |
| WBGene00007925 | <i>C34C12.6</i>             | 0.022 | 2.1 |
| WBGene00006476 | <i>rhgf-2</i>               | 0.009 | 2.1 |
| WBGene00000532 | <i>clh-5</i>                | 0.031 | 2.1 |
| WBGene00000602 | <i>col-13</i>               | 0.036 | 2.1 |
| WBGene00019666 | <i>sago-1<sup>S*</sup></i>  | 0.024 | 2.1 |
| WBGene00016929 | <i>C54F6.12</i>             | 0.024 | 2.1 |
| WBGene00019331 | <i>dos-3</i>                | 0.008 | 2.1 |
| WBGene00004272 | <i>rab-8</i>                | 0.045 | 2.1 |
| WBGene00044349 | <i>Y71G12B.32</i>           | 0.000 | 2.1 |
| WBGene00000729 | <i>col-156</i>              | 0.027 | 2.1 |
| WBGene00013981 | <i>ZK507.6</i>              | 0.036 | 2.1 |
| WBGene00010470 | <i>cdr-4</i>                | 0.027 | 2.1 |
| WBGene00013292 | <i>Y57G11A.4</i>            | 0.017 | 2.0 |
| WBGene00011561 | <i>ttr-15</i>               | 0.009 | 2.0 |
| WBGene00001073 | <i>dpy-11</i>               | 0.026 | 2.0 |
| WBGene00021789 | <i>nol-6</i>                | 0.017 | 2.0 |
| WBGene00010523 | <i>K03B8.4</i>              | 0.040 | 2.0 |
| WBGene00001971 | <i>hmg-1.1<sup>S*</sup></i> | 0.022 | 2.0 |
| WBGene00019826 | <i>R02E4.1</i>              | 0.004 | 2.0 |
| WBGene00002990 | <i>lin-1</i>                | 0.038 | 1.9 |
| WBGene00018488 | <i>acs-1</i>                | 0.048 | 1.9 |
| WBGene00004164 | <i>pqn-83</i>               | 0.015 | 1.9 |
| WBGene00004702 | <i>rsp-5</i>                | 0.004 | 1.9 |
| WBGene00002261 | <i>ldb-1</i>                | 0.047 | 1.9 |
| WBGene00006543 | <i>tbx-2</i>                | 0.039 | 1.9 |
| WBGene00008571 | <i>F08B12.1</i>             | 0.040 | 1.9 |
| WBGene00020109 | <i>R151.6</i>               | 0.013 | 1.9 |
| WBGene00012186 | <i>mlt-11*</i>              | 0.043 | 1.8 |
| WBGene00020263 | <i>T05E8.3</i>              | 0.010 | 1.8 |
| WBGene00011731 | <i>acbp-5</i>               | 0.037 | 1.8 |
| WBGene00018341 | <i>F42A10.5</i>             | 0.049 | 1.8 |

|                       |                                   |              |            |
|-----------------------|-----------------------------------|--------------|------------|
| <b>WBGene00000100</b> | <b><i>ajm-1<sup>S*</sup></i></b>  | <b>0.026</b> | <b>1.8</b> |
| <b>WBGene00000730</b> | <b><i>col-157</i></b>             | <b>0.023</b> | <b>1.8</b> |
| <b>WBGene00000728</b> | <b><i>col-155</i></b>             | <b>0.030</b> | <b>1.8</b> |
| <b>WBGene00004701</b> | <b><i>rsp-4*</i></b>              | <b>0.006</b> | <b>1.7</b> |
| <b>WBGene00000727</b> | <b><i>col-154</i></b>             | <b>0.029</b> | <b>1.7</b> |
| <b>WBGene00022164</b> | <b><i>Y71H2AL.1</i></b>           | <b>0.042</b> | <b>1.7</b> |
| <b>WBGene00014186</b> | <b><i>nhr-244</i></b>             | <b>0.019</b> | <b>1.7</b> |
| <b>WBGene00002051</b> | <b><i>ifa-3</i></b>               | <b>0.004</b> | <b>1.7</b> |
| <b>WBGene00019850</b> | <b><i>srt-18</i></b>              | <b>0.019</b> | <b>1.7</b> |
| <b>WBGene00009381</b> | <b><i>F34H10.4</i></b>            | <b>0.023</b> | <b>1.7</b> |
| <b>WBGene00019237</b> | <b><i>H24G06.1</i></b>            | <b>0.021</b> | <b>1.7</b> |
| <b>WBGene00001928</b> | <b><i>his-54</i></b>              | <b>0.042</b> | <b>1.7</b> |
| <b>WBGene00003911</b> | <b><i>pak-1</i></b>               | <b>0.025</b> | <b>1.6</b> |
| <b>WBGene00010317</b> | <b><i>idh-1<sup>S*</sup></i></b>  | <b>0.044</b> | <b>1.6</b> |
| <b>WBGene00003891</b> | <b><i>osm-11<sup>S*</sup></i></b> | <b>0.047</b> | <b>1.6</b> |
| <b>WBGene00015757</b> | <b><i>C14C6.3</i></b>             | <b>0.009</b> | <b>1.6</b> |
| <b>WBGene00014098</b> | <b><i>ZK836.2</i></b>             | <b>0.022</b> | <b>1.6</b> |
| <b>WBGene00011604</b> | <b><i>T08A11.1</i></b>            | <b>0.029</b> | <b>1.5</b> |
| <b>WBGene00015181</b> | <b><i>B0416.5</i></b>             | <b>0.003</b> | <b>1.5</b> |
| <b>WBGene00002196</b> | <b><i>kin-10</i></b>              | <b>0.124</b> | <b>1.5</b> |
