# Supplementary material for: Identification of Wnt Pathway Target Genes Regulating the Division and Differentiation of Larval Seam Cells and Vulval Precursor Cells in Caenorhabditis elegans
Source: PubMed Central journal article supplement (PMC4528312; doi:10.1534/g3.115.017715), 2015-06-05
Supplement: supp_g3.115.017715_TableS2.pdf [file supp_g3.115.017715_TableS2.pdf]

**Table S2 24 putative Wnt target genes in common between Jackson et al., 2014 and this work.** Of the 239 putative Wnt pathway regulated genes from seam cells and VPCs identified here by mRNA tagging, 24 genes were also identified by Jackson et al., 2014 in a non-tissue specific analysis of Wnt upregulated genes.

| <b>Gene WB ID</b> | <b>Gene</b>     |
|-------------------|-----------------|
| WBGene00000615    | <i>col-38</i>   |
| WBGene00000626    | <i>col-49</i>   |
| WBGene00000647    | <i>col-71</i>   |
| WBGene00000930    | <i>dao-4</i>    |
| WBGene00001984    | <i>hog-1</i>    |
| WBGene00004202    | <i>pry-1</i>    |
| WBGene00006509    | <i>tag-164</i>  |
| WBGene00006539    | <i>tbb-6</i>    |
| WBGene00008472    | <i>E03H4.4</i>  |
| WBGene00009898    | <i>dod-23</i>   |
| WBGene00010470    | <i>cdr-4</i>    |
| WBGene00011077    | <i>R07B1.5</i>  |
| WBGene00011594    | <i>T07G12.3</i> |
| WBGene00011624    | <i>T08G5.3</i>  |
| WBGene00012046    | <i>T26E4.4</i>  |
| WBGene00012783    | <i>Y43C5A.3</i> |
| WBGene00013754    | <i>fbxa-116</i> |
| WBGene00015442    | <i>C04F1.1</i>  |
| WBGene00016058    | <i>nspd-3</i>   |
| WBGene00017485    | <i>F15E6.4</i>  |
| WBGene00018295    | <i>oac-29</i>   |
| WBGene00018416    | <i>retr-1</i>   |
| WBGene00019234    | <i>ugt-8</i>    |
| WBGene00043147    | <i>nspd-6</i>   |
