# Supplementary material for: Identification of Wnt Pathway Target Genes Regulating the Division and Differentiation of Larval Seam Cells and Vulval Precursor Cells in Caenorhabditis elegans
Source: PubMed Central journal article supplement (PMC4528312; doi:10.1534/g3.115.017715), 2015-06-05
Supplement: supp_g3.115.017715_TableS3.pdf [file supp_g3.115.017715_TableS3.pdf]

**Table S3 Genes in common between van der Bent et al., 2014 and this work.** Of the 239 putative Wnt pathway regulated genes from seam cells and VPCs identified here by mRNA tagging, 35 genes were also identified by van der Bent et al., 2014 as genes that were differentially expressed between a wild type strain and a strain carrying a loss-of-function mutation in *bar-1*. The third column indicates whether expression of the gene was decreased or increased in the *bar-1(ga80)* strain relative to wild type. Genes with an asterisk (\*) were identified as downregulated upon loss of *bar-1* in van der Bent et al. 2014 and upregulated upon expression of an activated BAR-1 protein in this work and in Jackson et al. 2014.

| Gene WB ID     | Gene             | <i>bar-1(ga80)</i> expression |
|----------------|------------------|-------------------------------|
| WBGene00000493 | <i>che-14</i>    | decreased                     |
| WBGene00000615 | <i>col-38*</i>   | decreased                     |
| WBGene00000626 | <i>col-49*</i>   | decreased                     |
| WBGene00000647 | <i>col-71*</i>   | decreased                     |
| WBGene00000711 | <i>col-138*</i>  | decreased                     |
| WBGene00000735 | <i>col-162</i>   | decreased                     |
| WBGene00000930 | <i>dao-4*</i>    | decreased                     |
| WBGene00001073 | <i>dpy-11*</i>   | decreased                     |
| WBGene00001691 | <i>grd-2*</i>    | decreased                     |
| WBGene00001885 | <i>his-11</i>    | decreased                     |
| WBGene00001984 | <i>hog-1*</i>    | decreased                     |
| WBGene00002393 | <i>lpr-1</i>     | decreased                     |
| WBGene00004394 | <i>rol-1</i>     | decreased                     |
| WBGene00011077 | <i>R07B1.5*</i>  | decreased                     |
| WBGene00011594 | <i>T07G12.3*</i> | decreased                     |
| WBGene00011665 | <i>T09F5.1</i>   | decreased                     |
| WBGene00012186 | <i>mlt-11</i>    | decreased                     |
| WBGene00013514 | <i>Y73F4A.1</i>  | decreased                     |
| WBGene00015172 | <i>B0410.3</i>   | decreased                     |
| WBGene00015442 | <i>C04F1.1*</i>  | decreased                     |
| WBGene00015453 | <i>C04G6.2</i>   | decreased                     |
| WBGene00015950 | <i>C18A11.4*</i> | decreased                     |
| WBGene00017783 | <i>F25E5.2*</i>  | decreased                     |
| WBGene00022024 | <i>Y64H9A.2</i>  | decreased                     |
| WBGene00077489 | <i>C04G6.13</i>  | decreased                     |
| WBGene00000720 | <i>col-147</i>   | increased                     |
| WBGene00006539 | <i>tbb-6</i>     | Increased                     |
| WBGene00007297 | <i>C04F12.1</i>  | Increased                     |
| WBGene00010051 | <i>F54D5.5</i>   | Increased                     |
| WBGene00011434 | <i>T04D3.5</i>   | Increased                     |
| WBGene00011561 | <i>ttr-15</i>    | Increased                     |
| WBGene00012783 | <i>Y43C5A.3</i>  | Increased                     |
| WBGene00015865 | <i>C16E9.1</i>   | Increased                     |
| WBGene00016919 | <i>C54E4.4</i>   | Increased                     |
| WBGene00021379 | <i>Y37E11B.7</i> | increased                     |
