# Supplementary material for: Identification of Wnt Pathway Target Genes Regulating the Division and Differentiation of Larval Seam Cells and Vulval Precursor Cells in Caenorhabditis elegans
Source: PubMed Central journal article supplement (PMC4528312; doi:10.1534/g3.115.017715), 2015-06-05
Supplement: supp_g3.115.017715_TableS5.pdf [file supp_g3.115.017715_TableS5.pdf]

**Table S5 27 seam cell/VPC Wnt regulated genes validated by qPCR.** 105 genes (~44%) of 239 putative Wnt target genes were tested by qRT-PCR to validate the directional change observed by microarray, and 27 (26%) genes passed the verification screen (were upregulated  $\geq 1.5$  fold in response to Wnt pathway over-activation). Twelve genes (shown in the bottom half of the table) were also downregulated  $\geq 1.5$  fold in response to Wnt pathway under-activation. *gpd-2* was the reference gene. Biological triplicates of control (*dels10*) and experimental samples (*dels10; huls1* and *dels10; dels26*) were analyzed.

| Gene WB ID     | Gene              | fold change Wnt over-activation | fold change Wnt under-activation |
|----------------|-------------------|---------------------------------|----------------------------------|
| WBGene00000626 | <i>col-49</i>     | 947.5                           | 1.3                              |
| WBGene00012046 | <i>T26E4.4</i>    | 190.1                           | 1.6                              |
| WBGene00010743 | <i>K10D6.3</i>    | 151.0                           | 0.9                              |
| WBGene00021997 | <i>Y59E9AR.1</i>  | 6.8                             | 1.2                              |
| WBGene00010538 | <i>ttr-3</i>      | 5.7                             | 1.2                              |
| WBGene00000516 | <i>cki-1</i>      | 4.5                             | 1.2                              |
| WBGene00009590 | <i>ttr-4</i>      | 4.5                             | 1.0                              |
| WBGene00015769 | <i>C14C11.7</i>   | 4.1                             | 1.2                              |
| WBGene00010856 | <i>M04C9.1</i>    | 3.0                             | 0.8                              |
| WBGene00015605 | <i>C08E3.13</i>   | 2.8                             | 0.8                              |
| WBGene00003102 | <i>mab-5</i>      | 2.0                             | 0.9                              |
| WBGene00021379 | <i>Y37E11B.7</i>  | 1.9                             | 1.1                              |
| WBGene00002990 | <i>lin-1</i>      | 1.6                             | 0.6                              |
| WBGene00021927 | <i>Y55F3AM.10</i> | 1.6                             | 1.1                              |
| WBGene00003763 | <i>nlp-25</i>     | 1.5                             | 0.7                              |
| WBGene00011561 | <i>ttr-15</i>     | 1.5                             | 0.8                              |
| WBGene00009807 | <i>pepm-1</i>     | 10.4                            | 0.3                              |
| WBGene00004202 | <i>pry-1</i>      | 4.1                             | 0.1                              |
| WBGene00008435 | <i>glna-2</i>     | 3.8                             | 0.5                              |
| WBGene00000072 | <i>add-1</i>      | 2.2                             | 0.1                              |
| WBGene00001692 | <i>grd-3</i>      | 1.8                             | 0.1                              |
| WBGene00006660 | <i>twk-5</i>      | 1.7                             | 0.5                              |
| WBGene00012783 | <i>Y43C5A.3</i>   | 1.7                             | 0.4                              |
| WBGene00015196 | <i>B0454.5</i>    | 1.6                             | 0.2                              |
| WBGene00000406 | <i>cdk-4</i>      | 1.6                             | 0.4                              |
| WBGene00012591 | <i>nspe-1</i>     | 1.6                             | 0.3                              |
| WBGene00005025 | <i>sqv-7</i>      | 1.5                             | 0.5                              |
